1 Clustering co-abundant genes identifies components of the gut  
2 microbiome that are reproducibly associated with colorectal  
3 cancer and inflammatory bowel disease

4  
5 Samuel S. Minot, Ph.D.\*  
6 Microbiome Research Initiative  
7 Fred Hutchinson Cancer Research Center  
8 Seattle, Washington, USA  
9 [sminot@fredhutch.org](mailto:sminot@fredhutch.org)  
10 ORCID: 0000-0003-1639-3905

11  
12 Amy D. Willis, Ph.D.  
13 Department of Biostatistics  
14 University of Washington  
15 Seattle, Washington, USA  
16 [adwillis@uw.edu](mailto:adwillis@uw.edu)  
17 ORCID: 0000-0002-2802-4317

18  
19 \* Corresponding author  
20  
21  
22  
23  
24  
25  
26  
27  
28  
29  
30  
31  
32  
33  
34  
35  
36  
37  
38  
39  
40  
41  
42  
43  
44  
45  
46  
47  
48

49

## 50 **Abstract**

51

52 **Background:** Whole-genome “shotgun” (WGS) metagenomic sequencing is an increasingly widely  
53 used tool for analyzing the metagenomic content of microbiome samples. While WGS data  
54 contains gene-level information, it can be challenging to analyze the millions of microbial genes  
55 which are typically found in microbiome experiments. To mitigate the ultrahigh dimensionality  
56 challenge of gene-level metagenomics, it has been proposed to cluster genes by co-abundance to  
57 form Co-Abundant Gene groups (CAGs). However, exhaustive co-abundance clustering of  
58 millions of microbial genes across thousands of biological samples has previously been intractable  
59 purely due to the computational challenge of performing trillions of pairwise comparisons.

60 **Results:** Here we present a novel computational approach to the analysis of WGS datasets in  
61 which microbial gene groups are the fundamental unit of analysis. We use the Approximate  
62 Nearest Neighbor heuristic for near-exhaustive average linkage clustering to group millions of  
63 genes by co-abundance. This results in thousands of high-quality CAGs representing complete  
64 and partial microbial genomes. We applied this method to publicly available WGS microbiome  
65 surveys and found that the resulting microbial CAGs associated with inflammatory bowel disease  
66 (IBD) and colorectal cancer (CRC) were highly reproducible and could be validated independently  
67 using multiple independent cohorts.

68 **Conclusions:** This powerful approach to gene-level metagenomics provides a powerful path  
69 forward for identifying the biological links between the microbiome and human health. By  
70 proposing a new computational approach for handling high dimensional metagenomics data, we  
71 identified specific microbial gene groups that are associated with disease that can be used to  
72 identify strains of interest for further preclinical and mechanistic experimentation.

73

74

## 75 **Background**

76

77 Metagenomic analysis of the microbiome typically falls into the categories of taxonomic  
78 classification, metabolic pathway reconstruction, or genome reconstruction. While each has been  
79 used to good effect, each also has its own limitations. Taxonomic analysis is constrained by the  
80 size and quality of reference databases, which have started to provide decreasing taxonomic  
81 precision as the number of sequenced genomes grows [1]. Metabolic analysis is limited by our  
82 ability to annotate biochemical function from primary sequence, with only a minority of genes  
83 receiving any sort of annotation. Genome reconstruction (or “genome-resolved metagenomics”)  
84 has made immense contributions to our understanding of microbial diversity and evolution, but is  
85 challenging to exhaustively characterize environments like the human gut, which contain hundreds  
86 or thousands of strains. In contrast, we took the approach of quantifying each individual gene *de*  
87 *novo* from a given metagenome. While this approach presented considerable computational  
88 challenges, it is unconstrained by the limitations of reference databases or annotation systems  
89 and therefore presents the possibility of discovering novel biological patterns in the human  
90 microbiome.

91

92 While the microbiome has been implicated in a number of human diseases, we chose to focus on  
93 CRC and IBD because of the availability of metagenomic data from multiple independent  
94 cohorts[2–8]. Associative studies characterizing differences in the microbiome as a function of  
95 disease status are complicated by the effect of disease and treatment process on the microbiome  
96 [9–12] but it is still possible that some of the differences in the microbiome may play some causal  
97 role or implicate a causal biological process.

98

99 The approach of gene-level metagenomics is not new to this study and has been proposed  
100 previously as an alternative to taxonomic or metabolic pathway analysis [13]. Indeed even the  
101 popular HUMAnN2 tool [14] includes gene-family abundance estimation using the UniRef  
102 database of proteins [15]. We took the previously-described approach of grouping together genes  
103 that are consistently found at a similar level of abundance across multiple samples [13]. Such co-  
104 abundant genes are likely to be found on the same chromosome or piece of DNA across multiple  
105 samples, such as in the core genome for a bacterial species or consortium, on a plasmid that may  
106 move between strains, or as part of an operon in the accessory genome of a species that is only  
107 found in a subset of strains. Biologically speaking, co-abundant genes are not independent  
108 entities, and can be grouped together for purposes of inferring their relationship with human health  
109 and disease. In addition, grouping genes by co-abundance finds low-dimensional structure in  
110 high-dimensional gene-level data, mitigating challenges with the statistical analysis of high-  
111 dimensional metagenomics data.

112  
113

## 114 **Results and Discussion**

115

116 The primary analytical challenge that we encountered in this project was that of efficiently  
117 clustering microbial genes based on co-abundance. This general approach has been proposed  
118 and implemented previously [13, 16], but existing implementations do not perform exhaustive  
119 searches for co-abundant genes because performing all pairwise comparisons of millions of genes  
120 in large microbiome datasets [17] is computationally intractable. To overcome this obstacle we  
121 took advantage of the Approximate Nearest Neighbor (ANN) heuristic, which is able to robustly  
122 identify candidate subsets of co-abundant genes without having to perform all pairwise  
123 comparisons [18, 19]. We implemented a Python package (“ann\_linkage\_clustering”) to perform  
124 exhaustive average linkage clustering using the cosine distance metric on any dataset containing  
125 gene abundance data across a set of samples. While this method is relatively computationally  
126 intensive, we were able to execute it in a reasonable amount of time using commodity “cloud”  
127 computational resources (e.g., 17 hours for a set of 5 million genes across 199 samples with a  
128 256GB RAM node). While this clustering procedure is not expected to be deterministic, our  
129 experience has been that clusters are generally reproduced across replicates and we are actively  
130 studying the generalizability of gene clustering as a function of input data and clustering  
131 thresholds. In the ideal case this approach improves the precision of estimating gene-level  
132 abundance by combining data from multiple correlated observations, as well as reducing the  
133 number of hypotheses to test in an association study, while maintaining the interpretation  
134 advantages of distinct genetic elements (core genome, plasmid, virus, etc.).

135

136 We applied this novel approach to gene-level metagenomics to test for an association of the gut  
137 microbiome across two distinct human diseases: IBD and CRC. We selected these diseases  
138 because each has been studied by multiple groups who have collected stool samples and  
139 performed metagenomic WGS sequencing (Table S1) [2–8]. Because each of these previous  
140 studies used slightly different protocols for selecting patients, collecting samples, and performing  
141 sequencing, an integrated analysis of these datasets should serve to identify those signals in the  
142 microbiome which are most robust to the methodological and experimental confounders.

143

144 The CAGs identified in this project contained 2-23,856 genes, with the majority of genes found in  
145 CAGs ranging between 10 and 2,000 genes in size and containing the range of metabolic  
146 functions expected from complete and partial microbial genomes (Fig. S1). Visual inspection of  
147 the genes making up these CAGs also demonstrated the highly consistent patterns of abundance  
148 displayed by the genes which were ultimately grouped into these CAGs (Fig. 1). We also analyzed

149 a published single-cell sequencing dataset from the stool microbiome [20] and found that genes  
150 from the same CAG were found in the same physical cell at 3-9X the rate expected by chance  
151 (Fig. S2). The size, functional content, and clear pattern of co-abundance displayed by the genes  
152 in this analysis suggest that the CAGs used for statistical analysis represent biological units that  
153 are meaningful reflections of the composition of the microbiome across multiple independent  
154 datasets.  
155

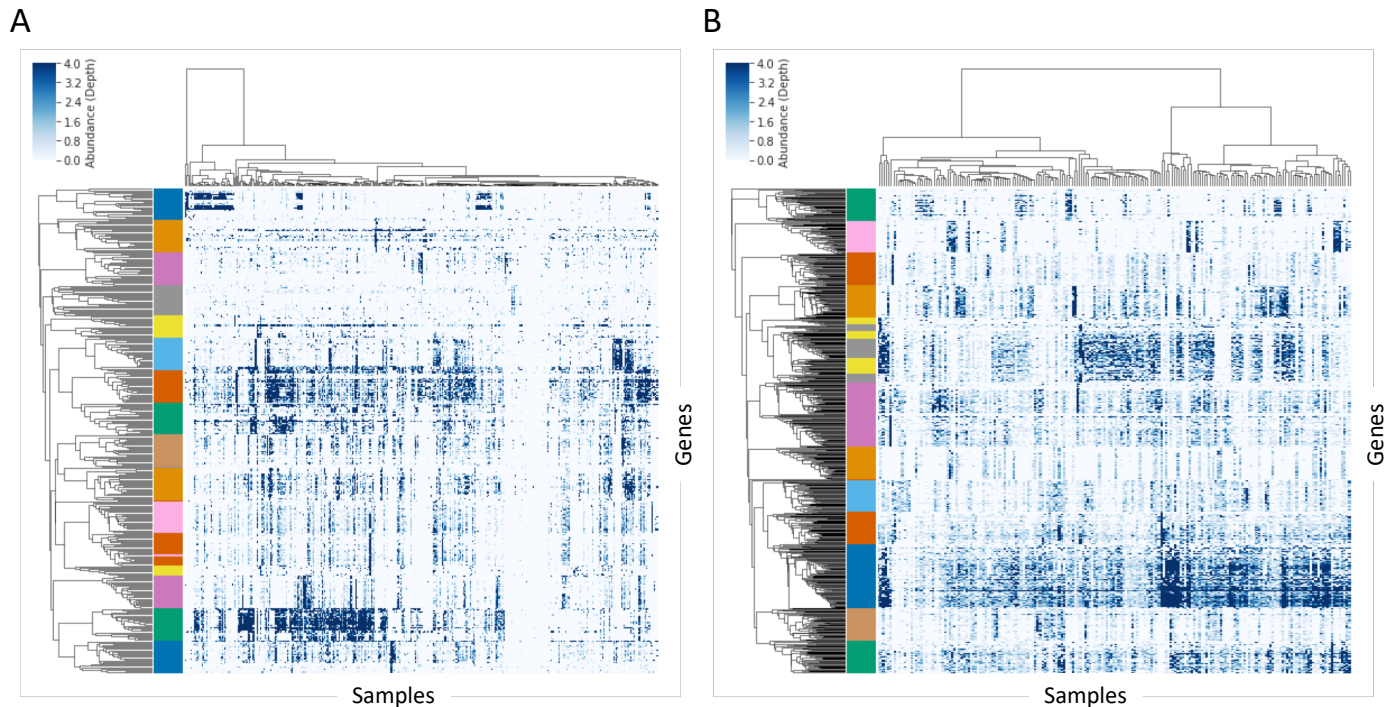

156  
157 **Figure 1.** Patterns of gene-level co-abundance across all microbiome samples from a subset of  
158 CAGs. Each row represents a single microbial gene, each column represents a single biological  
159 sample, and pixel color reflects the gene's relative abundance (sequencing depth) in the sample.  
160 A subset of CAGs and genes was randomly selected for display from the CRC datasets (A) and  
161 the IBD datasets (B). Unsupervised hierarchical clustering was used to group the rows and  
162 columns, and the left-hand color bar indicates the CAG assignment for each gene.  
163

164 Our approach to the bioinformatic and statistical analysis was to select a single study for each  
165 disease as the “discovery” cohort, and to use that dataset to build a *de novo* catalog of microbial  
166 genes and identify CAGs. That gene catalog and CAG grouping generated from the discovery  
167 cohort was subsequently used to analyze the additional validation cohorts. Our statistical model  
168 was relatively straightforward and used random effects modeling to estimate the difference in the  
169 centered-log ratio of the relative abundance of each CAG in the samples from people with and  
170 without the disease state (accounting for multiple sampling of some individuals with random  
171 effects models). We chose to group together all participants with any form of the disease state, as  
172 the criteria for disease classification was not consistent across studies. In this discovery-validation  
173 approach, those CAGs which had a q-value of  $< 0.2$  in the discovery cohort were subsequently  
174 tested in an additional “validation” cohort, and those CAGs which also had a q-value  $< 0.2$  in that  
175 second step and the same direction of effect were considered to be associated with disease.  
176

177 We found with this approach that the estimated coefficient of disease status in the set of CAGs  
178 associated with disease in the discovery cohort was significantly associated with the estimated  
179 coefficient in the validation cohort (Fig. 2A-B; CRC  $r=0.36$   $p<2E-16$ ; IBD  $r=0.30$   $p<2E-16$ ). Within

180 the set of CAGs that were associated with disease in the discovery dataset, 44.0% and 97.2%  
181 were significantly associated in the validation dataset for CRC and IBD, respectively. When  
182 performing the same analysis with unclustered gene-level abundances (a single gene randomly  
183 selected from each CAG), we found a roughly 20-40% lower correlation between the estimated  
184 coefficient of disease status (Fig 2C-D) and a much lower validation rate of 9.8% and 76.0%,  
185 respectively. We believe that this evidence supports the proposed utility of CAGs for detecting  
186 reproducible biological associations of the microbiome with host disease. Furthermore,  
187 24,502/36,871 CRC-associated CAGs had the same sign of the estimated coefficient in the  
188 validation cohort as in the discovery cohort ( $p < 1E-200$ , see Methods), and 28,629/31,895 IBD-  
189 associated CAGs had the same signed estimated coefficient ( $p < 1E-200$ ). We further  
190 demonstrated the extent of this association by displaying the abundance of the most strongly  
191 associated CAGs across a total of 3 (IBD) or 4 (CRC) cohorts (Fig 2E-F), suggesting that this  
192 association is not limited to the cohorts selected for discovery and validation. Over and above the  
193 claim that the microbiome is associated with disease in both cohorts, we believe that these results  
194 indicate that a substantial number of elements of the microbiome that are associated with disease  
195 in a given discovery cohort will also be associated with disease in a corresponding validation  
196 cohort.

197  
198 The pattern of association for the IBD datasets was dominated by the 98.5% of CAGs which had a  
199 positive coefficient, indicating that they were more abundant in participants without IBD (Fig 2B).  
200 We therefore investigated the gene-level richness, finding a lower level of gene richness observed  
201 in IBD samples compared to healthy controls (Fig S3) [21], corroborating previous observations of  
202 lower alpha diversity in IBD [22, 23]. Without our use of the centered log-ratio to adjust for the  
203 compositional nature of these datasets the decreased abundance of a large fraction of the  
204 microbiome may have resulted in a spurious finding that the remainder had increased in  
205 abundance [24], but in fact we found that very few CAGs were consistently increased in  
206 abundance in IBD relative to the geometric mean of each sample. In addition to the decrease of  
207 overall gene richness, the lower number of CAGs found to be consistently enriched in IBD may  
208 also be due to an overall heterogeneity or 'dispersion' in the organisms which are positively  
209 associated with IBD across different people at a given point in time [14, 25]. However, there was a  
210 subset of CAGs which were consistently found to be more abundant in IBD, which may represent  
211 those bacteria which are able to thrive in the environment of the inflamed gut. Indeed, the  
212 taxonomic annotation of the genes in these CAGs is enriched for organisms which have been  
213 implicated in some previous studies of IBD and gut pathogens, including Enterobacteriaceae such  
214 as *Escherichia/Shigella* and *Salmonella* [3, 22, 23] which may exhibit some growth advantage in  
215 the context of either the increased oxygen content of the inflamed intestine or the antibiotics used  
216 in IBD treatment [9, 10]. Other organisms, such as *Ruminococcus gnavus*, were only enriched in  
217 IBD for a subset of genes ( $n=77$ ), supporting the previous hypothesis of a strain-specific  
218 association with IBD [4]. There was also a set of KEGG annotations that were weakly but  
219 consistently enriched in this set of IBD-associated genes related to colonization and pathogenesis,  
220 such as fimbriae genes *fimA* (K07345) and *fimD* (K07347), iron transport (K02010), and  
221 putrescine transport (K02052; K11072; K11076).

222

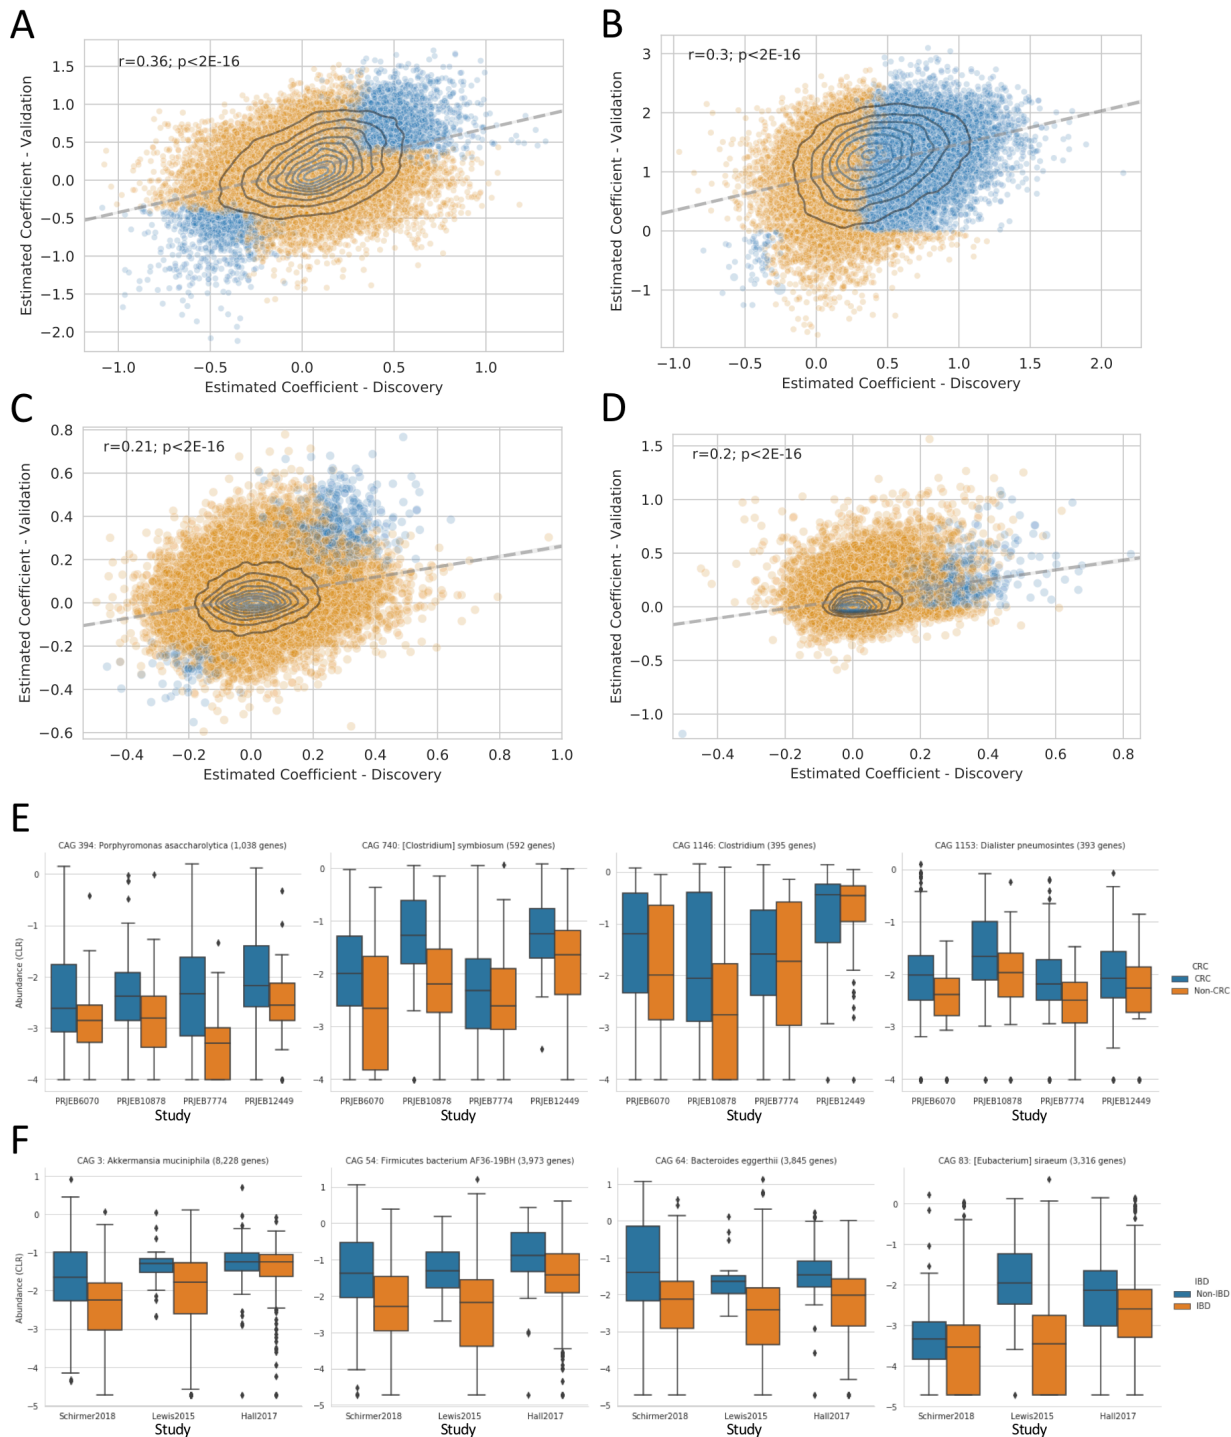

223  
224  
225  
226  
227  
228  
229  
230  
231  
232

**Figure 2.** Reproducible association of CAG abundance with disease status for CRC (A, E) and IBD (B, F). The estimated coefficient plotted in A-D represents the log<sub>10</sub> change in relative abundance associated with health (positive values) or disease (negative values), for each disease state. The estimated coefficient for the discovery dataset is on the horizontal axis, and the estimated coefficient for the validation dataset is on the vertical axis. The results from CAG-based analysis are shown in A-B, while the results calculated from unclustered gene-level abundances are shown in C-D. The abundance of four representative CAGs are shown in E-F across all available datasets, with colors indicating the health status associated with each sample.

233 The pattern of association for the CRC datasets was generally balanced between CAGs that were  
234 more abundant in healthy participants and those that were more abundant in disease (Fig 2A). Of  
235 the largest CAGs that were reproducibly associated with disease, those which were more  
236 abundant in healthy participants tended to be classified as Clostridia (via alignment to NCBI  
237 RefSeq), while those which were more abundant in participants with CRC were more  
238 taxonomically diverse (Fig 3A-B). Moreover, we found the functional annotations of the genes in  
239 those CAGs to be particularly interesting. There were four KEGG annotations that were  
240 significantly enriched in the set of CAGs found to be more abundant in CRC samples (Fisher's  
241 exact test, Holm-Sidak  $\alpha=0.01$ ): 1) *grdA* (K10670) is involved in metabolism of  
242 glycine/sarcosine/betaine, and higher levels of glycine is a recognized hallmark of cancer cells  
243 [26, 27]; 2) *oxyR* (K04761) is a transcriptional regulator which regulates genes protecting from the  
244 biochemical damage induced by reactive oxygen species, of which markedly higher levels are  
245 associated with progressive tumors [28, 29]; 3) *abgT* (K12942) is a transporter responsible for  
246 uptake of p-aminobenzoyl-glutamate, and may also import other dipeptides [30]; and 4) *afuA/fbpA*  
247 (K02012) are transporters responsible for importing iron [31], which is likely to be more abundant  
248 in the gastrointestinal lumen of individuals with CRC due to bleeding. Three of these four  
249 annotated functions have clear links to the altered environment of the gut microbiome expected  
250 during CRC, and likely promote the growth of these organisms in that setting. It remains to be  
251 seen whether those organisms which are able to thrive in the CRC gut microbiome also contribute  
252 to progression of disease.

253

254 One advantage of a gene-based approach to metagenomic analysis is that any CAG of interest  
255 can be directly compared with the genomes of bacterial isolates in order to identify strains  
256 containing each gene. Of the set of genes that we identified as consistently associated with CRC  
257 and IBD, we found a number of strains containing large fractions of these genes (Fig 3C-D). We  
258 furthermore propose that this approach of aligning disease-associated genes to whole microbial  
259 genomes may be used to identify the members of any culture collection which are likely to have  
260 the largest effect in an experimental model of these human diseases.

261

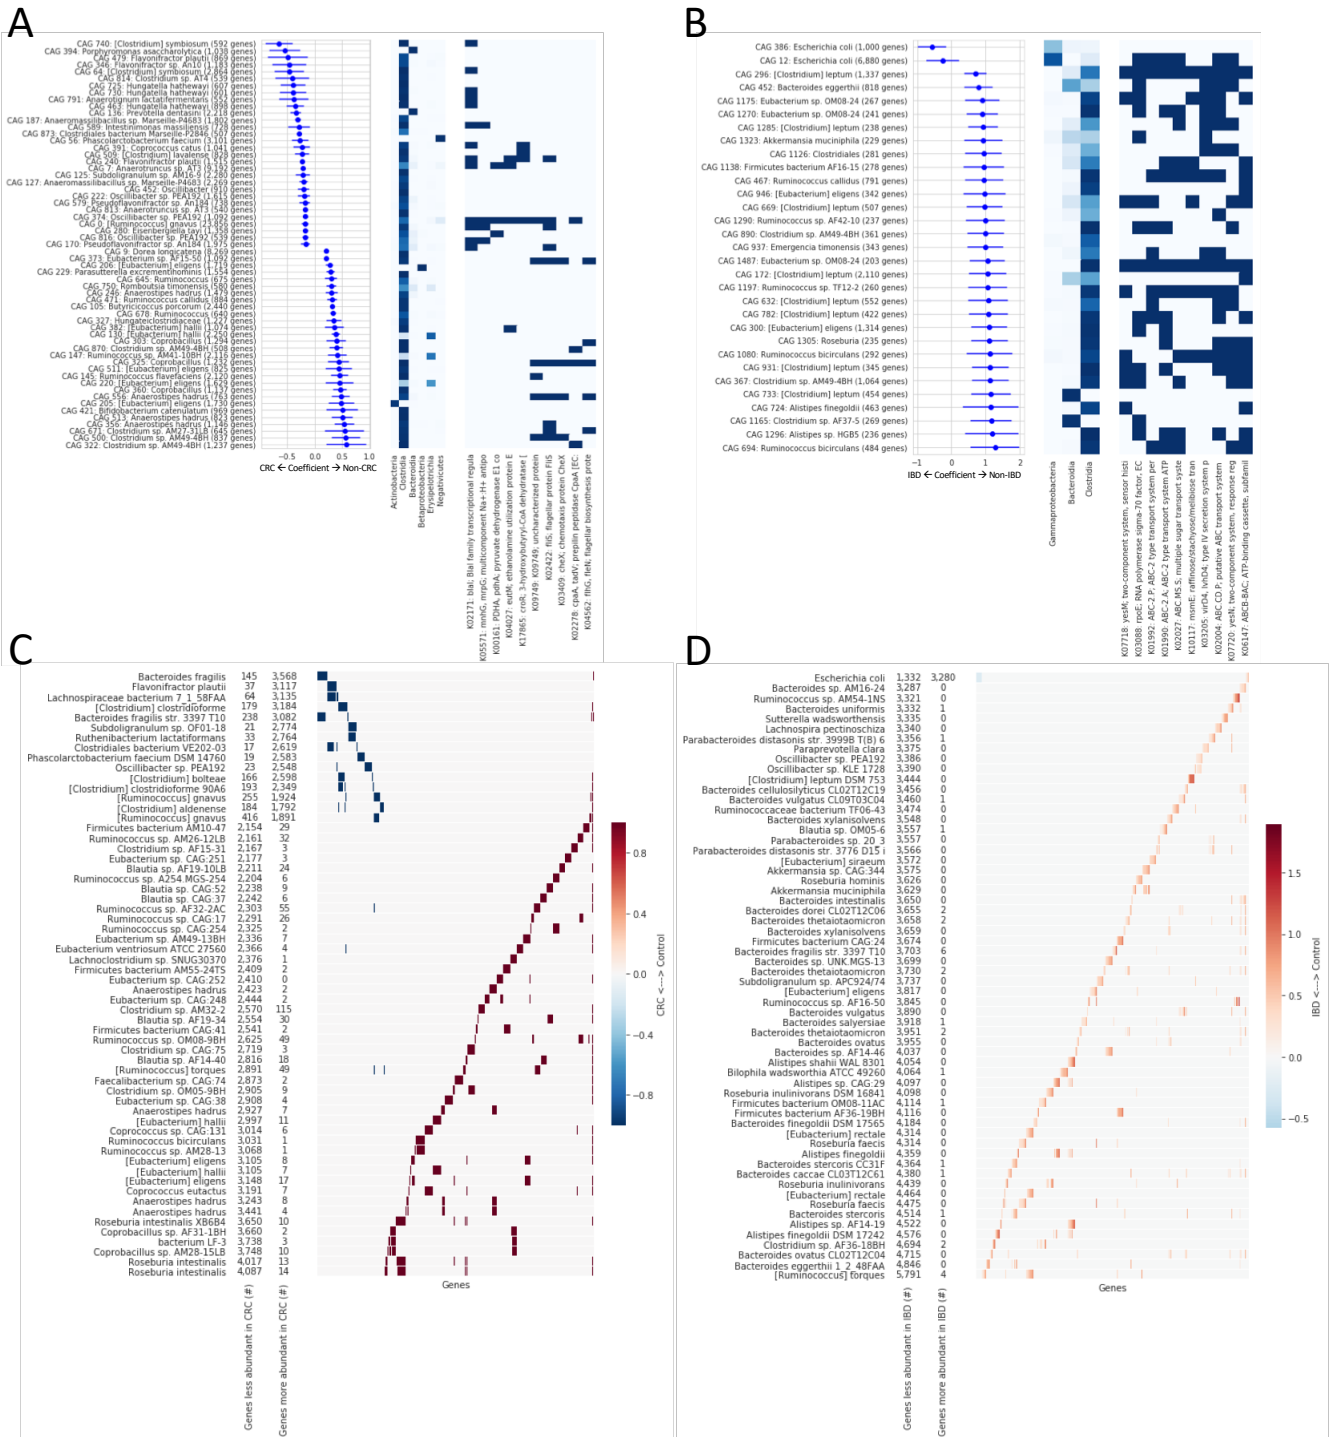

**Figure 3.** Association of individual microbes with CRC (A & C) and IBD (B & D). A & B show the estimated coefficient of abundance for individual CAGs with disease status (log10 mean and 90% confidence intervals, left panel), the taxonomic assignment (middle panel) and functional assignment (right panel) of genes within each of those CAGs. C & D show the number of genes from disease-associated CAGs that are found within bacterial genomes from NCBI RefSeq, showing both the total number of genes for each genome, as well as a heatmap showing which disease-associated genes are found in which genomes.

262  
263  
264  
265  
266  
267  
268  
269  
270  
271  
272



## 273 Conclusions

274

275 Having identified microbial protein-coding genes that are associated with CRC and IBD, we  
276 anticipate that other researchers may build on these findings in multiple ways. Researchers may  
277 compare this list of disease-associated genes to any genomes of interest in order to identify  
278 specific isolates and/or genes which may be perturbed in a controlled experimental setting to test  
279 the effect of microbes on host disease. Additionally, researchers may apply this general approach  
280 (quantification of CAGs from a *de novo* gene catalog) to their own metagenomic datasets in order  
281 to identify additional genes associated with any outcome of interest. While latter use-case may be  
282 implemented using the computational tools and associated Docker images described in the  
283 Methods, we are hoping to further support this methodological approach by developing  
284 reproducible analytical workflows that are more easily executed by the general microbiome  
285 research community.

286

287 By proposing an approach to the analysis of metagenomic data that produces consistent results  
288 across multiple heterogeneous datasets, we are addressing one of the most important challenges  
289 in metagenomics, namely, reproducibility. Our findings suggest that indeed co-abundant gene  
290 groups are a reproducible and biologically meaningful unit of analysis. In addition, microbial genes  
291 are a meaningful and useful unit of analysis because they can be linked to individual microbial  
292 genomes, taxonomic annotations, and predicted metabolic functionality. Using this approach, we  
293 identify a list of gene groups that are associated with human diseases in multiple cohorts, and we  
294 identify specific microbial isolates that contain these genes. The development of diagnostics or  
295 therapeutics based on this list of genes and genomes is left to future work.

296

297

## 298 Methods

299

### 300 Datasets

301

| Group | Used For   | Name                 | NCBI BioProject |
|-------|------------|----------------------|-----------------|
| IBD   | Discovery  | Schirmer, et al. [2] | PRJNA389280     |
| IBD   | Validation | Lewis, et al. [3]    | SRP057027       |
| IBD   | Validation | Hall, et al. [4]     | PRJNA385949     |
| CRC   | Discovery  | Zeller, et al. [5]   | PRJEB6070       |
| CRC   | Validation | Feng, et al. [8]     | PRJEB7774       |
| CRC   | Validation | Yu, et al. [7]       | PRJEB10878      |
| CRC   | Validation | Vogtmann, et al. [6] | PRJEB12449      |

302

**Table S1.** Published datasets analyzed in this study.

303

### 304 Gene-level metagenomic analysis pipeline

305

306 All microbiome WGS data was analyzed using a Docker-based workflow, with each individual step  
307 executed inside a Docker image. The workflow outlined below was executed independently for the  
308 set of samples from Schirmer, et al., as well as for the set of samples from Zeller, et al.  
309

310 The sequence of analyses is as follows:

311

312 1. Each sample was individually downloaded from NCBI SRA with Entrez Direct

313 • Docker image: quay.io/fhcrc-microbiome/get\_sra:v0.4

314 • Code: <https://github.com/FredHutch/docker-sra>

315 • Wrapper script: get\_sra.py

316 • Software version(s):

317 • sratoolkit.2.8.2-ubuntu64

318 • CMake3.11

319 • fastq-pair 4ae91b0d9074410753d376e5adfb2ddd090f7d85

320

321 2. Each sample was individually assembled with metaSPAdes

322 • Docker image: quay.io/fhcrc-microbiome/metaspades:v3.11.1--10

323 • Code: <https://github.com/FredHutch/docker-metaspades>

324 • Wrapper script: run\_metaspades.py

325 • Software version(s): SPAdes-3.11.1-Linux

326

327 3. Each sample's metagenomic assembly was annotated using Prokka

328 • Docker image: quay.io/fhcrc-microbiome/metaspades:v3.11.1--8

329 • Code: <https://github.com/FredHutch/docker-metaspades>

330 • Software version(s): Prokka v1.12; barrnap v0.9

331 • Wrapper script: run\_prokka.py

332

333 4. The protein-coding sequences from all of the metagenomic assemblies for a given dataset  
334 were clustered at 90% amino acid identity using mmSeqs2 to create a set of non-redundant  
335 protein sequences

336 • Docker image: quay.io/fhcrc-microbiome/integrate-metagenomic-assemblies:v0.4

337 • Code: <https://github.com/FredHutch/integrate-metagenomic-assemblies>

338 • Software version(s): biopython==1.70; MMseqs2 v2-23394

339 • Wrapper script: integrate\_assemblies.py

340

341 5. Each sample was aligned against the non-redundant protein sequences using DIAMOND,  
342 with post-alignment filtering using FAMLI. The Docker image associated with this step  
343 includes both the DIAMOND aligner and the FAMLI filtering code.

344 • Docker image: quay.io/fhcrc-microbiome/famli:v1.1

345 • Code: <https://github.com/FredHutch/famli>

346 • Software version(s): DIAMOND v0.9.10; famli==1.0

347 • Wrapper script: famli

348 • Parameters:

349 • min\_qual = 30

350 • min\_score = 20

351 • query\_gencode = 11

352

353 6. The non-redundant protein sequences were functionally annotated via eggNOG-mapper

- 354           • Docker image: quay.io/fhcr-microbiome/eggnog-mapper:v0.1
- 355           • Code: <https://github.com/FredHutch/docker-eggnog-mapper>
- 356           • Software version(s): eggNOG-mapper = 1.0.3--py27\_0
- 357           • Wrapper script: run\_eggnog\_mapper.py
- 358
- 359       7. The non-redundant protein sequences were analyzed via the taxonomic assignment
- 360       functionality of DIAMOND (using NCBI's RefSeq as the reference database)
- 361           • Docker image: quay.io/fhcr-microbiome/famli:v1.3
- 362           • Code: <https://github.com/FredHutch/famli>
- 363           • Software version(s): DIAMOND v0.9.22
- 364           • Wrapper script: diamond-tax.py
- 365           • Parameters: top\_pct = 1
- 366
- 367       8. The non-redundant protein sequences were grouped into CAGs based on their abundance
- 368       profile across the dataset.
- 369           • Docker image: quay.io/fhcr-microbiome/find-cags:v0.11.1
- 370           • Code: <https://github.com/FredHutch/find-cags>
- 371           • Software version(s): nmslib = 1.7.3.5
- 372           • Wrapper script: find-cags.py
- 373           • Parameters:
- 374               • min\_samples = 10
- 375               • max\_dist = 0.3
- 376               • normalization = sum
- 377
- 378       9. Group the outputs of all previous steps into a single HDF file
- 379           • Docker image: quay.io/fhcr-microbiome/experiment-collection:latest
- 380           • Code: <https://github.com/FredHutch/minot-experiment-collection>
- 381           • Wrapper script: make-experiment-collection.py
- 382

383       The validation datasets were analyzed by aligning the raw WGS reads against the non-redundant

384       protein sequences generated from the relevant discovery dataset as described in Step 5

385       described above. The final HDF file creation step (9) includes the results of that quantification step

386       for the validation datasets as well as the discovery datasets.

387

388       Given the difficulty of providing a workflow execution system that can be used effectively by a

389       broad range of users, we have elected to provide all of the individual tools needed to run a

390       complete analytical workflow, with public Docker images making up each individual step, instead

391       of providing a complete workflow system that each user would need to customize for their own

392       execution engine (Slurm, PBS, Kubernetes, AWS, GCP, Azure, etc.). This approach enables

393       execution of the exact code that we used in this analysis in a platform-independent manner using

394       the highest standard of reproducibility (Docker containers).

395

396       Our implementation of the analytical workflow described above relied upon the Amazon Web

397       Service and its Batch API, which allows users to submit individual jobs for analysis using utilities

398       from the boto3 library in Python. While this implementation does not represent a complete

399       workflow management system, the code used for this execution is available at

400       <https://github.com/FredHutch/aws-batch-helpers/> in the batch\_helpers/batch\_task\_manager.py

401       module.

402

403

## 404 Grouping genes by co-abundance

405

406 We did not find any public tools for grouping genes by co-abundance that were appropriate to the  
407 scale of our datasets. To implement our own approach for finding CAGs, we utilized the Non-  
408 Metric Space Library (`nmslib`, <https://pypi.org/project/nmslib/>) which implements the Approximate  
409 Nearest Neighbor (ANN) algorithm [18, 19] and obviates the need for calculating the all-by-all  
410 distance matrix typically used by clustering algorithms. The abundance matrix used for clustering  
411 was created by calculating the depth of sequencing for each individual gene within each sample  
412 and normalizing for total sequencing depth. The distance metric used to quantify the dissimilarity  
413 of individual genes was the cosine distance. Gene clusters were identified iteratively by average  
414 linkage clustering and a fixed cophenetic distance threshold. The ANN algorithm was used to  
415 identify subsets of genes which were likely to be highly co-abundant, and which could be clustered  
416 independently of the whole. The code executed for this analysis, as well as a Docker image  
417 containing all required dependencies, can be found in the summary of the complete analysis  
418 workflow (Step 8).

419

420

## 421 Correlating CAGs with health status

422

423 **CAG discovery:** For every CAG in the validation dataset, we tested the null hypothesis that the  
424 mean difference in CLR abundance between patients with and without disease was zero using the  
425 general linear model framework. Datasets with repeated measurements on subjects were  
426 modelled using a linear mixed effects model with subject as a random effect. We employed the  
427 centered-log ratio to address the compositionality and range constraint of the gene relative  
428 abundances, and it is consistent with the choice to group genes based on cosine distance. Using  
429 the `qvalue` R package (v2.8.0), we calculate the q-values for each CAG. Our set of “discovered  
430 CAGs” for validation is the set of CAGs with calculated q-value of 0.2 or less. These are the CAGs  
431 that would be considered statistically significant while controlling the FDR at 20%.

432 **CAG validation:** *For only the discovered CAGs*, we tested the null hypothesis that the mean  
433 difference in CLR abundance between patients with and without disease was zero in the validation  
434 datasets. Our “validated CAGs” are the CAGs in this set with calculated q-values of 0.2 or less,  
435 and that have an estimated difference in abundance between disease status groups of the same  
436 sign as the estimated difference in the discovery dataset.

437 **The probability of validating discovered CAGs:** To calculate the probability of validating  $C_2$  or  
438 more out of  $C_1$  CAGs under the global null hypothesis of no association between disease status  
439 and any CAG’s abundance, we bounded the p-value for validating discovered CAGs in the  
440 following way. Let  $X$  be the number of CAGs with q-values less than 0.2 for the validation data and  
441 with an estimated difference in CLR abundance across disease groups of the same sign in the  
442 validation and discovery datasets, and  $Y$  be the number of CAGs with an estimated difference in  
443 CLR abundance across disease groups of the same sign in the validation and discovery datasets.  
444 Since under the null the test statistics are approximately Normal(0,1)-distributed,

$$445 Pr_{H_0}(X \geq C_2) \leq Pr_{H_0}(Y \geq C_2) = Pr(Binomial(C_1, 0.5) \geq C_2) \approx Pr\left(Normal(0, 1) \geq \frac{C_2 - C_1/2}{\sqrt{C_1/2}}\right),$$

446 giving us a conservative p-value for the global null of no association.

447

448

## 449 Aligning protein-coding genes against RefSeq genomes

450

451 The alignment of individual protein-coding genes against the RefSeq collection of genomes in  
452 NCBI was executed using the Docker image hosted at [quay.io/fhcr-microbiome/docker-](https://quay.io/fhcr-microbiome/docker-diamond:v0.9.23-0)  
453 [diamond:v0.9.23—0](https://quay.io/fhcr-microbiome/docker-diamond:v0.9.23-0) and built using the Dockerfile hosted at [https://github.com/FredHutch/docker-](https://github.com/FredHutch/docker-diamond)  
454 [diamond](https://github.com/FredHutch/docker-diamond), running DIAMOND v0.9.23. The complete list of Prokaryotic RefSeq genomes was  
455 downloaded from <https://www.ncbi.nlm.nih.gov/genome/browse#!/prokaryotes/> and the query  
456 proteins were aligned via DIAMOND against the annotated protein-coding sequences from each  
457 genome individually. We implemented this analysis on the Amazon Web Service using the Batch  
458 API for execution and resource management.

459  
460  
461 Quantification of co-abundant genes in uncultured single cells

462  
463 Datasets from published single-cell sequencing microbiome experiments [20] were downloaded  
464 and split by 10X barcode (each corresponding to a single cell). The WGS data for each single cell  
465 was aligned against each reference gene catalog (for the CRC and IBD datasets) and filtered with  
466 FAML1 as described in workflow step 5, above. The result of this analysis was a count of the  
467 number of genes that were found in the same cell as another gene that is also part of the same  
468 CAG. As a comparison, we calculated the number of such genes that would be found with a  
469 randomly permuted set of CAG assignments.

470  
471

## 472 **Declarations**

473  
474 Ethics approval and consent to participate  
475 Not applicable

476  
477 Consent for publication  
478 Not applicable

479  
480 Availability of data and material  
481 The data produced in this analysis is available on the Synapse platform at  
482 <https://www.synapse.org/#!/Synapse:syn15623121> (doi:10.7303/syn15623121). The Synapse  
483 project will be made fully public upon acceptance for publication. The repository includes  
484 documentation describing the organization and formatting of relevant data files and includes all of  
485 the outputs from the bioinformatic pipeline used for gene-level metagenomic analysis, as well as  
486 the Jupyter notebooks used to analyze those datasets and produce the figures and tables  
487 presented here.

488  
489 Competing interests  
490 AW: None to declare.  
491 SM holds financial interest in Reference Genomics, Inc. (One Codex) and consults for the  
492 American Type Culture Collection (ATCC).

493  
494 Funding  
495 Not applicable

496  
497 Authors' contributions  
498 SM developed the novel CAG identification method and performed all primary data analysis; AW  
499 developed the statistical analysis and discovery-validation framework; both authors contributed to  
500 figure generation and writing the manuscript.

501

## 502 Acknowledgements

503 The authors are grateful for support from the Fred Hutch Microbiome Research Initiative (SM),  
504 start-up funds from the Department of Biostatistics at the University of Washington (AW), and  
505 valuable intellectual contribution and support from Dr. Jonathan L. Golob.

506

507

## 508 **References**

509

- 510 1. Nasko DJ, Koren S, Phillippy AM, Treangen TJ. RefSeq database growth influences the  
511 accuracy of k-mer-based lowest common ancestor species identification. *Genome Biol.*  
512 2018;19:165. doi:10.1186/s13059-018-1554-6.
- 513 2. Schirmer M, Franzosa EA, Lloyd-Price J, McIver LJ, Schwager R, Poon TW, et al. Dynamics of  
514 metatranscription in the inflammatory bowel disease gut microbiome. *Nat Microbiol* 2017. 2018;:1.  
515 doi:10.1038/s41564-017-0089-z.
- 516 3. Lewis JD, Chen EZ, Baldassano RN, Otley AR, Griffiths AM, Lee D, et al. Inflammation,  
517 Antibiotics, and Diet as Environmental Stressors of the Gut Microbiome in Pediatric Crohn's  
518 Disease. *Cell Host Microbe*. 2015;18:489–500. doi:10.1016/j.chom.2015.09.008.
- 519 4. Hall AB, Yassour M, Sauk J, Garner A, Jiang X, Arthur T, et al. A novel *Ruminococcus gnavus*  
520 clade enriched in inflammatory bowel disease patients. *Genome Med*. 2017;9:103.  
521 doi:10.1186/s13073-017-0490-5.
- 522 5. Zeller G, Tap J, Voigt AY, Sunagawa S, Kultima JR, Costea PI, et al. Potential of fecal  
523 microbiota for early-stage detection of colorectal cancer. *Mol Syst Biol*. 2014;10:766–766.  
524 doi:10.15252/msb.20145645.
- 525 6. Vogtmann E, Hua X, Zeller G, Sunagawa S, Voigt AY, Hercog R, et al. Colorectal cancer and  
526 the human gut microbiome: Reproducibility with whole-genome shotgun sequencing. *PLoS One*.  
527 2016;11:1–13. doi:10.1371/journal.pone.0155362.
- 528 7. Yu J, Feng Q, Wong SH, Zhang D, Liang Q yi, Qin Y, et al. Metagenomic analysis of faecal  
529 microbiome as a tool towards targeted non-invasive biomarkers for colorectal cancer. *Gut*.  
530 2015;66:70–8. doi:10.1136/gutjnl-2015-309800.
- 531 8. Feng Q, Liang S, Jia H, Stadlmayr A, Tang L, Lan Z, et al. Gut microbiome development along  
532 the colorectal adenoma–carcinoma sequence. *Nat Commun*. 2015;6:6528.  
533 doi:10.1038/ncomms7528.
- 534 9. Rigottier-Gois L. Dysbiosis in inflammatory bowel diseases: the oxygen hypothesis. *ISME J*.  
535 2013;7:1256–61. doi:10.1038/ismej.2013.80.
- 536 10. Ni J, Wu GD, Albenberg L, Tomov VT. Gut microbiota and IBD: causation or correlation? *Nat*  
537 *Rev Gastroenterol Hepatol*. 2017;14:573–84. doi:10.1038/nrgastro.2017.88.
- 538 11. Hong B-Y, Sobue T, Choquette L, Dupuy AK, Thompson A, Burleson JA, et al. Chemotherapy-  
539 induced oral mucositis is associated with detrimental bacterial dysbiosis. *Microbiome*. 2019;7:66.  
540 doi:10.1186/s40168-019-0679-5.
- 541 12. Cong J, Zhu J, Zhang C, Li T, Liu K, Liu D, et al. Chemotherapy Alters the Phylogenetic  
542 Molecular Ecological Networks of Intestinal Microbial Communities. *Front Microbiol*.  
543 2019;10:1008. doi:10.3389/fmicb.2019.01008.
- 544 13. Nielsen HB, Almeida M, Juncker AS, Rasmussen S, Li J, Sunagawa S, et al. Identification and  
545 assembly of genomes and genetic elements in complex metagenomic samples without using  
546 reference genomes. *Nat Biotechnol*. 2014;32:822–8. doi:10.1038/nbt.2939.
- 547 14. Franzosa EA, McIver LJ, Rahnavard G, Thompson LR, Schirmer M, Weingart G, et al.  
548 Species-level functional profiling of metagenomes and metatranscriptomes. *Nat Methods*.  
549 2018;15:962–8. doi:10.1038/s41592-018-0176-y.
- 550 15. Suzek BE, Wang Y, Huang H, McGarvey PB, Wu CH. UniRef clusters: a comprehensive and

- 551 scalable alternative for improving sequence similarity searches. *Bioinformatics*. 2015;31:926–32.  
552 doi:10.1093/bioinformatics/btu739.
- 553 16. Plaza Oñate F, Le Chatelier E, Almeida M, Cervino ACL, Gauthier F, Magoulès F, et al.  
554 MSPminer: abundance-based reconstitution of microbial pan-genomes from shotgun  
555 metagenomic data. *Bioinformatics*. 2018;:bty830. doi:10.1093/bioinformatics/bty830.
- 556 17. Qin J, Li R, Raes J, Arumugam M, Burgdorf KS, Manichanh C, et al. A human gut microbial  
557 gene catalogue established by metagenomic sequencing. *Nature*. 2010;464:59–65.  
558 doi:10.1038/nature08821.
- 559 18. Har-Peled S, Indyk P, Motwani R. Approximate Nearest Neighbor: Towards Removing the  
560 Curse of Dimensionality. *Theory Comput*. 2012;8:321–50. doi:10.4086/toc.2012.v008a014.
- 561 19. Kushilevitz E, Ostrovsky R, Rabani Y. Efficient Search for Approximate Nearest Neighbor in  
562 High Dimensional Spaces. *SIAM J Comput*. 2000;30:457–74. doi:10.1137/S0097539798347177.
- 563 20. Bishara A, Moss EL, Kolmogorov M, Parada AE, Weng Z, Sidow A, et al. High-quality genome  
564 sequences of uncultured microbes by assembly of read clouds. *Nat Biotechnol*. 2018.  
565 doi:10.1038/nbt.4266.
- 566 21. Willis A, Bunge J. Estimating diversity via frequency ratios. *Biometrics*. 2015;71:1042–9.  
567 doi:10.1111/biom.12332.
- 568 22. Gevers D, Kugathasan S, Denson LA, Vázquez-Baeza Y, Van Treuren W, Ren B, et al. The  
569 Treatment-Naive Microbiome in New-Onset Crohn’s Disease. *Cell Host Microbe*. 2014;15:382–92.  
570 doi:10.1016/j.chom.2014.02.005.
- 571 23. Morgan XC, Tickle TL, Sokol H, Gevers D, Devaney KL, Ward D V, et al. Dysfunction of the  
572 intestinal microbiome in inflammatory bowel disease and treatment. *Genome Biol*. 2012;13:R79.  
573 doi:10.1186/gb-2012-13-9-r79.
- 574 24. Gloor GB, Macklaim JM, Pawlowsky-Glahn V, Egozcue JJ. Microbiome datasets are  
575 compositional: And this is not optional. *Front Microbiol*. 2017;8:2224.  
576 doi:10.3389/fmicb.2017.02224.
- 577 25. Halfvarson J, Brislawn CJ, Lamendella R, Vázquez-Baeza Y, Walters WA, Bramer LM, et al.  
578 Dynamics of the human gut microbiome in inflammatory bowel disease. *Nat Microbiol* 2017 25.  
579 2017;2:nmicrobiol20174. doi:10.1038/nmicrobiol.2017.4.
- 580 26. Jain M, Nilsson R, Sharma S, Madhusudhan N, Kitami T, Souza AL, et al. Metabolite Profiling  
581 Identifies a Key Role for Glycine in Rapid Cancer Cell Proliferation. *Science* (80- ).  
582 2012;336:1040–4. doi:10.1126/science.1218595.
- 583 27. Locasale JW. Serine, glycine and one-carbon units: cancer metabolism in full circle. *Nat Rev*  
584 *Cancer*. 2013;13:572–83. doi:10.1038/nrc3557.
- 585 28. Kumari S, Badana AK, G MM, G S, Malla R. Reactive Oxygen Species: A Key Constituent in  
586 Cancer Survival. *Biomark Insights*. 2018;13:1177271918755391.  
587 doi:10.1177/1177271918755391.
- 588 29. Liou G-Y, Storz P. Reactive oxygen species in cancer. *Free Radic Res*. 2010;44:479–96.  
589 doi:10.3109/10715761003667554.
- 590 30. Green JM, Hollandsworth R, Pitstick L, Carter EL. Purification and Characterization of the  
591 Folate Catabolic Enzyme p-Aminobenzoyl-Glutamate Hydrolase from *Escherichia coli*. *J Bacteriol*.  
592 2010;192:2407–13. doi:10.1128/JB.01362-09.
- 593 31. Willemsen PT, Vulto I, Boxem M, de Graaff J. Characterization of a periplasmic protein  
594 involved in iron utilization of *Actinobacillus actinomycetemcomitans*. *J Bacteriol*. 1997;179:4949–  
595 52. <http://www.ncbi.nlm.nih.gov/pubmed/9244288>. Accessed 6 Dec 2018.

596  
597  
598

599  
600

## Supplementary Figures

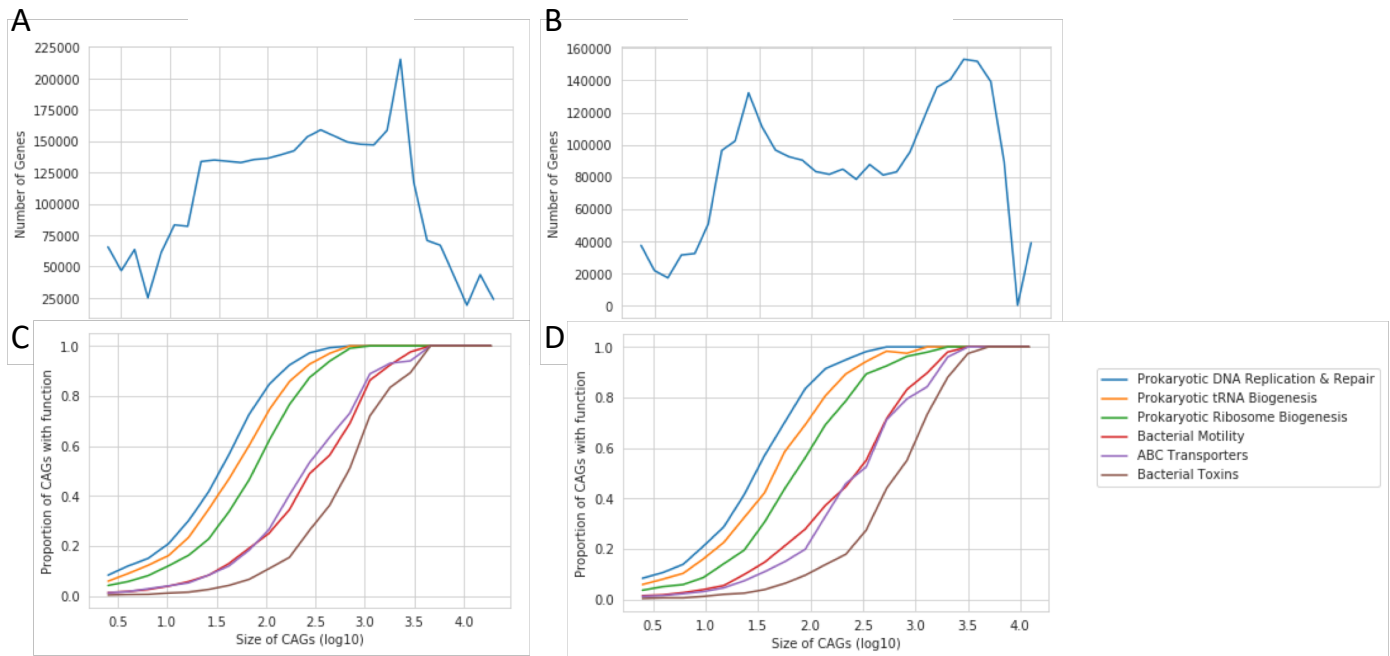

601  
602  
603  
604  
605  
606  
607  
608

**Supplementary Figure S1.** The distribution of CAG size (genes per CAG; A & B) and the functional annotation of genes in CAGs is shown by CAG size (C & D). Each gene can be annotated with a range of biological functions, and the proportion of CAGs of a given size containing at least one functional annotation is shown (C & D). The CAGs generated from the CRC datasets are shown in A & C, while the CAGs generated from the IBD datasets are shown in B & D. The horizontal axis is shared between panels A & C, as well as B & D.

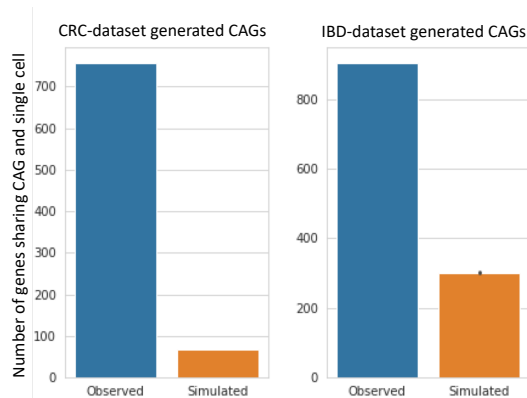

609  
610  
611  
612  
613  
614  
615

**Supplementary Figure S2.** Single-cell microbiome datasets were analyzed using the gene catalogs and CAG groupings from the CRC and IBD datasets. Co-occurrence was measured as the number of genes that were found in the same cell with another gene from the same CAG. Simulations were performed by random permutation, with 1,000 replicates. Orange bars show mean and standard deviation.



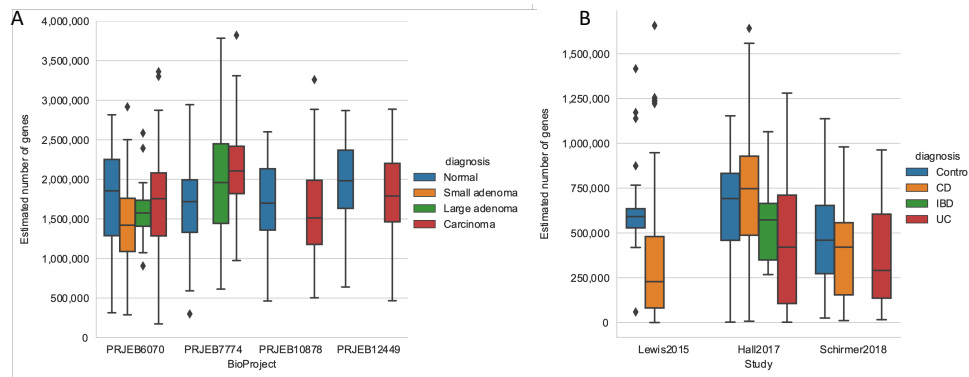

616

617

**Supplementary Figure S3.** Alpha diversity by diagnosis across cohorts. The number of total genes in each sample was estimated with breakaway for both the CRC (A) and IBD (B) cohorts.

618

619

620

621

### Supplementary Tables

622

623

**Supplementary Table S2.** Description of genes associated with CRC, including the CAG grouping, correlation coefficient, taxonomic annotation, and functional annotation. Public repository URL: <https://www.synapse.org/#!Synapse:syn17104367>

624

625

626

627

**Supplementary Table S3.** Description of genes associated with IBD, including the CAG grouping, correlation coefficient, taxonomic annotation, and functional annotation. Public repository URL: <https://www.synapse.org/#!Synapse:syn17104250>

628

629

630
